# Supplementary material for: Low Socioeconomic Status Is Associated With Increased Complication Rates: Are Risk Adjustment Models Necessary in Cervical Spine Surgery?
Source: PubMed Central journal article supplement — Global Spine J. 2019 Sep 12;10(6):748–53. doi: 10.1177/2192568219874763 (PMC7383791; doi:10.1177/2192568219874763), 2019-09-12
Supplement: GSJ874763_suppl_mat.pdf [file GSJ874763_suppl_mat.pdf]

## **APPENDIX**

Patients undergoing primary 1-2 level ACDF were identified using ICD-9-CM procedure coded 80.02 + 80.51 + 81.62

ICD-9-CM diagnosis codes used for excluding patients with neoplasia, infection, trauma, or additional procedures: 170.2, 170.6, 198.5, 213.2, 238.0, 239.2, 324.1, 324.9, 730.0x, 730.1x, 741.02, 741.03, 741.92, 741.93, 810.x, 805.2, 805.3, 805.4, 805.5, 806.2x, 806.3x, 806.4, or 806.5

ICD-9-CM diagnosis codes used for complications:

### **Complications**

Deep vein thrombosis: 453.40, 453.41, 451.42

Pulmonary embolism: 415.11, 415.12, 415.13, 415.19

Neurological complications: 431, 432.x, 434.00, 434.11, 434.90, 434.91, 437.1, 953.x, 954.1, 954.8, 954.9, 955.x, 956.x, 957.x

Cardiac complications: 99.71

Respiratory complications: 518.51, 518.52, 518.53, 518.81, 518.82, 518.83, 518.84, 917.3x

Wound complication: 996.63, 998.02, 998.10, 998.11, 998.12, 998.13, 998.5, 998.51, 998.59, 998.30, 998.31, 998.32, 998.33

Intraoperative hemorrhage: 998.11, 998.12, 998.13

Phlebitis and thrombophlebitis: 451.0, 451.11, 451.19, 451.2, 451.8x, 451.9

Subcutaneous emphysema: 998.81

Acute renal failure: 584.5, 584.6, 584.7, 584.8, 584.9

Acute myocardial infarction: 410.x0, 410.x1
